# Supplementary material
Source: Research Square preprint supplement (doi:10.21203/rs.3.rs-9026055/v1)
Supplement: Supplementary file 1 [file 0ebfa9c4630ae3d6dbde476d.xlsx]

## Sheet: Sheet1
Timestamp	Patient	Ethnicity	Pregnancy Number	Delivery History	Valvular Abnormality	Ejection Fraction (%)	E/A Ratio	LVIDD	Congenital Heart Disease	Cardiac Rhythm	Treatment	Maternal Outcome	Diabetes Mellitus	Hypertension	Smoking
2023-04-08 11:10:22	Patient 1	Sasak	3	1. SC, 2. Normal, 3.Sc	MR Ringan Sedang	0.34	E/A Fusi	7.8	-	Sinus reguler 86bpm, Normal Axis, LVH	Furosemide, Spirolakton, Fluemosid,	Alive	No	No	No
2024-01-02 13:30:26	Patient 2		1						VSD			Alive
2024-01-02 20:16:12	Patient 3	Sasak	3						VSD	RVH	- O2 NRM 15 lpm, turun perlahan jika saturasi membaik - IVFD NaCl 0.9% 500ml / 24 jam - Minum max 1000ml / 24 jam - Propranolol 20mg tiap 8 jam PO - Mini Aspi 1 tab tiap 24 jam PO - Diet jantung rendah garam	Death	No	No
2024-01-08 14:41:38	Patient 4
2024-01-13 12:39:40	Patient 5									Sinus	Nifedipin	Alive		Yes
2024-01-24 19:38:57	Patient 6	Sasak	3								Methyldopa	Alive	No	Yes	No
2024-01-29 12:04:59	Patient 7	Sasak	2								Lantus, novarapid, cefadroxil, paracetamol, nifedipin	Alive	Yes	Yes	No
2024-01-29 12:08:05	Patient 8		1							Sinus	Amlodipin	Alive	No	Yes	No
2024-01-29 12:31:42	Patient 9	Sasak	2							Sinus	Digoxin	Alive	No	No	No
2024-01-29 12:59:22	Patient 10	Sasak	3		MS (Mitral Stenosis)					Atrial fibrilation	Bidoprolol, furosemid	Alive	No	No	No
2024-01-29 13:08:03	Patient 11	Bali	4		MR (Mitral regurgitation)					Atrial fibrilation	Digoxin	Alive	No	No	No
2024-01-29 13:18:33	Patient 12		5							tachycardia (HR>100)	Bisoprolol, spironolakton	Alive	No	No	No
2024-01-29 14:15:22	Patient 13	Sasak	3							tachycardia (HR>100)	Dexametason, nifedipin, ceftriaxone furosemide, bisoprolol	Alive	No	Yes	No
2024-01-29 14:34:09	Patient 14	Sasak	2							tachycardia (HR>100)	Ceftriaxone	Death	No	No	No
2024-01-29 15:07:06	Patient 15	Bugis	2						VSD	tachycardia (HR>100)			No	No	No
2024-01-29 15:32:25	Patient 16	Sasak	2								Cefixime, PCT, SF	Alive	No	No	No
2024-01-29 15:57:04	Patient 17	Bima	1							tachycardia (HR>100)	Nifedipin, mecobalamin, SF, Nicardipin, metildopa, cefadroxil		No	Yes	No
2024-01-29 22:12:58	Patient 18	Bali	4							tachycardia (HR>100)	Furosemide, mropenem, candesartan, amlodipin, ISDN	Alive	No	Yes	No
2024-01-30 05:51:01	Patient 19	SASAK	3							Sinus	Nifedipin, Methyldopa, Micardipine	Alive	No	Yes	No
2024-01-30 06:03:26	Patient 20		2								Asammefenamat, dexametason, ceftriaxon, ketorolac, tramadol, Vit A	Alive	No	No	No
2024-01-30 06:17:27	Patient 21	Sasak	3							LVH	Nifedipin, Paracetamol, peinlos, transamin, ranitidin, santagesik, duragesik path	Alive	No	Yes	No
2024-01-30 06:33:37	Patient 22	SASAK	4							RVH	Spironolakton, ceftriaxon, furosemid, ketorolac, santagesik, titosol, lansoprazol, N. Ace	Alive	No	No	No
2024-01-30 06:49:18	Patient 23	SASAK	3							Sinus	Nifedipin, Nicardipin, Methyldopa, Dexametason, ISDN	Alive	Yes	Yes	No
2024-01-30 13:18:41	Patient 24		6		PS (Pulmonal Stenosis)				VSD, ToF		Propanolol, PCT, Combivent, Ceftriaxone	Alive	No	No	No
2024-01-30 13:24:06	Patient 25	Bali	3							Sinus, tachycardia (HR>100)	Ceftriaxone, Mesoprostol	Alive	No	No	No
2024-01-30 14:13:46	Patient 26	Mbojo	5	Manual aid						Sinus	Bisoprolol, Spironolakton, Candesartan	Alive	No	Yes	No
2024-01-30 14:40:31	Patient 27	Mbojo	2						VSD, ToF	Sinus, LVH, RVH, tachycardia (HR>100)	Ferro Sulfat	Alive	No	No	No
2024-01-30 14:40:32	Patient 28	Sasak	5							LVH	Nifedipin, Methyldopa, Tramadol, MgSO4, Combivent, Cextriaxone, Paracetamol	Alive	No	Yes	No
2024-01-30 15:02:43	Patient 29	Sasak	3							Sinus	Ceftriaxone, Drip Oxitocin	Alive	No	No	No
2024-01-30 15:08:33	Patient 30	Bima	1							SVT, LVH	Diltiazem, Ketorolac, etabion, kaltrofen, paracetamol, domperidon	Alive	No	No	No
2024-01-30 15:12:23	Patient 31	BUGIS	2									Alive	No	No	No
2024-01-30 15:25:41	Patient 32	SAMAWA	1						VSD	Sinus	Nifedipin	Alive	No	No	No
2024-01-30 15:32:59	Patient 33	Jawa	1							Sinus	cefadroxil, asam mefenamat 500mg, domperidone. SF	Alive	No	Yes	No
2024-01-30 15:37:49	Patient 34	-	1							LVH	DRIP MGSo4	Alive	No	No	No
2024-01-31 13:32:39	Patient 35	Mbojo	1		MS (Mitral Stenosis)					tachycardia (HR>100)	Digoxin	Alive	No	No	No
2024-01-31 13:38:01	Patient 36	Mbojo	2							SVT	Kardioversi	Death	No	No	No
2024-01-31 14:09:54	Patient 37		3							Sinus	Amlodipin, Bisoprolol	Alive	No	Yes	No
2024-01-31 14:33:37	Patient 38	Mbojo	3		MR (Mitral regurgitation)					Sinus, Bradikardi (HR<50)	Amlodipin	Alive	No	No	No
2024-01-31 14:40:50	Patient 39	Sasak	1		MR (Mitral regurgitation), TR (tricuspid regurgitation)					LVH, RBBB	Bisoprolol	Alive	No	No	No
2024-01-31 14:54:11	Patient 40	Sasak	1									Alive	No	No	No
2024-01-31 15:10:50	Patient 41	Sasak	2							RVH, tachycardia (HR>100)	Nifedipin	Alive	No	Yes	No
2024-01-31 15:10:55	Patient 42	Sasak	3							Sinus	Nifedipin, Methyldopa, clonidine	Alive	No	Yes	No
2024-02-23 16:37:01	Patient 43	Sasak	1								Nifedipin, Methyldopa		No	No	No
2024-03-04 13:01:39	Patient 44	-	5		MS (Mitral Stenosis), MR (Mitral regurgitation)				ASD	tachycardia (HR>100)	Digoxin, Bisoprolol, Furosemide	Alive	No	No
2024-03-04 13:22:28	Patient 45	Sasak			MR (Mitral regurgitation), TR (tricuspid regurgitation), PR (Pulmonal regurgitation)						Spironolakton, Furosemide	Alive	No	Yes
2024-03-04 13:43:04	Patient 46	Sasak	4							LVH	Nifedipin, Methyldopa, MgSO4, dexametaxone	Alive	No	Yes
2024-08-09 12:34:24	Patient 47	-	2						ASD		None	Alive	No	No	No
2024-08-10 13:20:26	Patient 48	Sasak	3							SVT	Furosemid, Digoxin	Alive	No	No	No
2024-08-10 13:37:59	Patient 49	Bali	4							Atrial Flutter		Alive	No	No	No
2024-08-10 14:02:39	Patient 50	Samawa	6							AV Block		Alive	No	No	No
2024-08-10 14:09:50	Patient 51	-	1							SVT		Alive	No	No	No
2024-08-10 14:17:35	Patient 52	Dompu	2							AV Block		Alive	No	No	No
2024-08-10 14:27:52	Patient 53	Sasak	3							PAC			No	No	No
2024-08-10 14:46:12	Patient 54	Sasak	3							Atrial fibrilation		Alive	No	No	No
2024-08-16 10:31:03	Patient 55	Sasak	2							SVT		Death
